# Supplementary material
Source: PubMed Central journal article supplement (PMC5719875)
Supplement: NIHMS923924-supplement-Supp_Info.pdf [file NIHMS923924-supplement-Supp_Info.pdf]

**ADVANCED  
HEALTHCARE  
MATERIALS**

Supporting Information

for *Adv. Healthcare Mater.*, DOI: 10.1002/adhm.201700687

The Influence of Hyaluronic Acid and Glioblastoma Cell  
Coculture on the Formation of Endothelial Cell Networks in  
Gelatin Hydrogels

*Mai T. Ngo and Brendan A. Harley\**

Copyright WILEY-VCH Verlag GmbH & Co. KGaA, 69469 Weinheim, Germany, 2014.

## Supporting Information

### The influence of hyaluronic acid and glioblastoma cell co-culture on the formation of endothelial cell networks in gelatin hydrogels

Mai T. Ngo, Brendan A. Harley\*

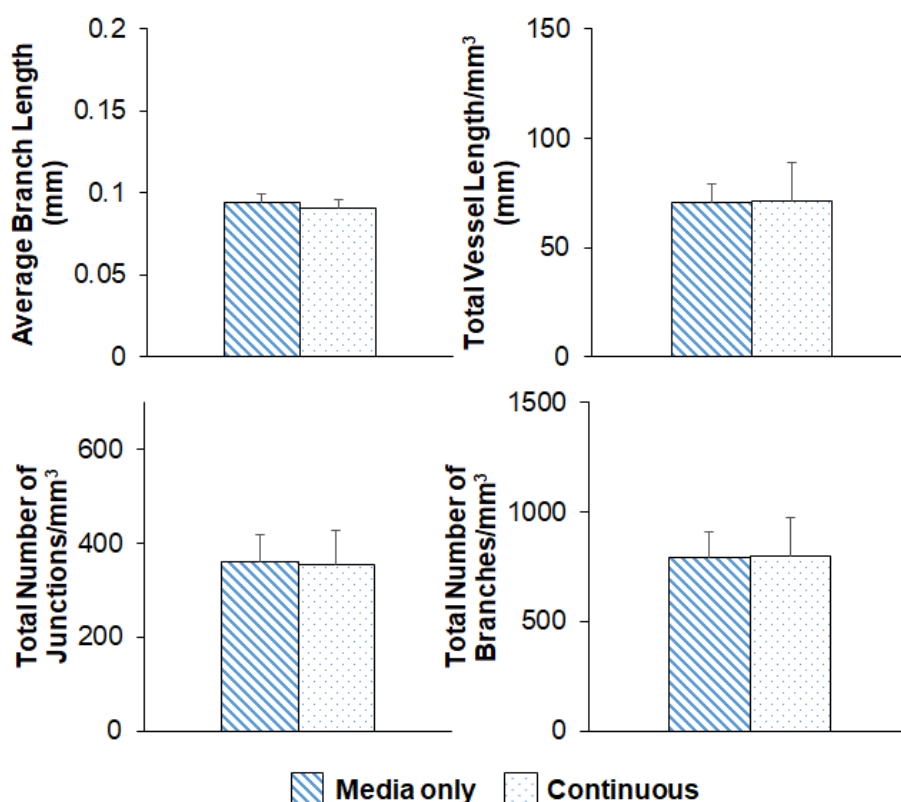

**Supplementary Figure 1.** Endothelial cell network complexity is not affected by the initial presence or absence of VEGF within the pre-polymer solution before photo-polymerization as long as VEGF is included in the culture media after photo-polymerization. **Media Only:** No VEGF was added to the pre-polymer solution prior to photo-polymerization, but cell-seeded hydrogels were cultured in VEGF-containing EGM-2 media. **Continuous:** Soluble VEGF (2 ng/mL) was incorporated into the pre-polymer solution prior to photo-polymerization, and hydrogels were cultured in VEGF-containing EGM-2 media.

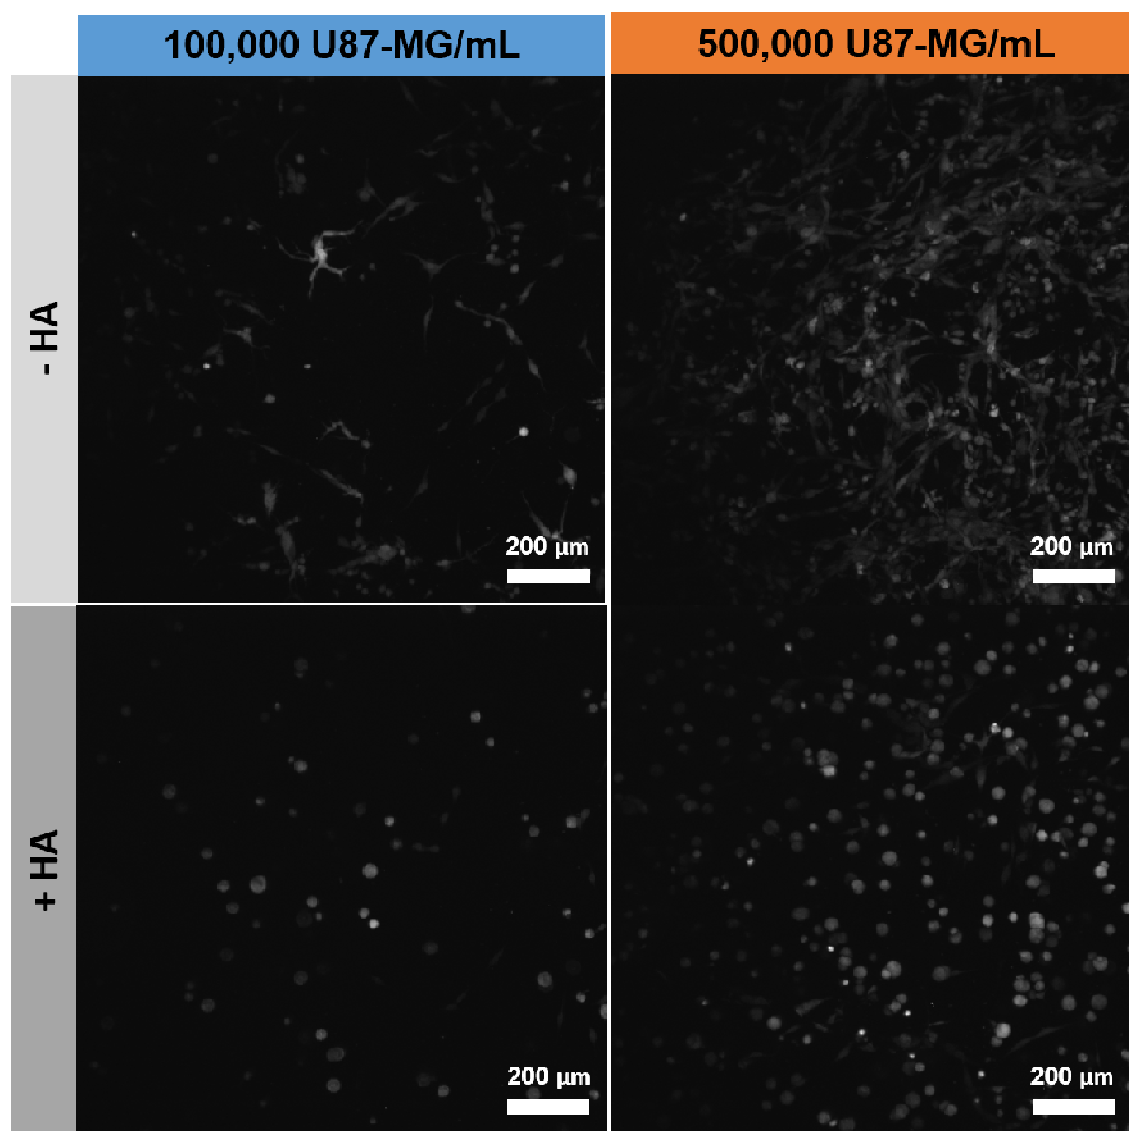

**Supplementary Figure 2.** Representative maximum intensity projection images depicting U87-MG cells cultured in EGM-2 media within GelMA (-HA) or HA-functionalized GelMA (+HA) hydrogels (4 wt%) after three days. Scale bar: 200  $\mu\text{m}$ .

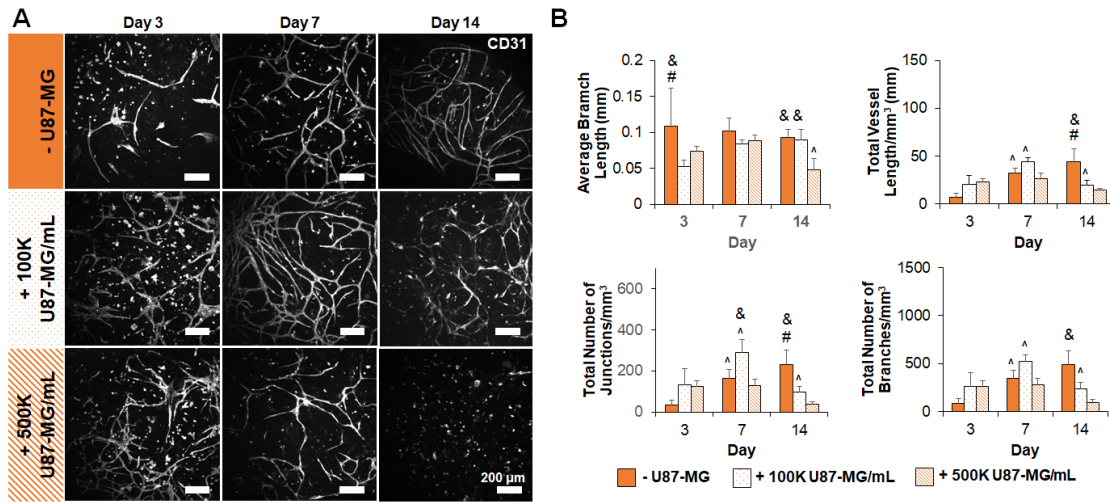

**Supplementary Figure 3.** (A) Representative maximum intensity projection images depicting endothelial cell network regression in the presence of U87-MG cells within HA-functionalized GelMA hydrogels (4 wt%, +HA) over fourteen days. Endothelial cells are labeled with CD31. Scale bar: 200  $\mu$ m. (B) Metrics for endothelial network complexity confirm endothelial cell network regression in the presence of U87-MG cells. Endothelial cell networks persist in the absence of U87-MG cells in HA-functionalized GelMA hydrogels. #: significant compared to 100K U87-MG/mL within time point ( $p < 0.05$ ). &: significant compared to 500K U87-MG/mL within time point ( $p < 0.05$ ). ^: significant compared to prior time point within same U87-MG cell density ( $p < 0.05$ ). Data presented as mean  $\pm$  SD,  $n = 6$ ,  $p$ -values calculated using one-way ANOVA with Tukey post-hoc.
